# Supplementary material for: Metabolic gene expression and epigenetic effects of the ketone body β-hydroxybutyrate on H3K9ac in bovine cells, oocytes and embryos
Source: PubMed Central journal article supplement (PMC6137158; doi:10.1038/s41598-018-31822-7), 2018-09-13
Supplement: 41598_2018_31822_MOESM1_ESM.pdf [file 41598_2018_31822_MOESM1_ESM.pdf]

**Title: Metabolic gene expression and epigenetic effects of the ketone body  $\beta$ -hydroxybutyrate on H3K9ac in bovine cells, oocytes and embryos**

**Authors: Juliano Rodrigues Sangalli\*, Rafael Vilar Sampaio, Maite del Collado, Juliano Coelho da Silveira, Tiago Henrique Camara de Bem, Felipe Perecin, Lawrence Charles Smith & Flávio Vieira Meirelles.**

\*julianors@usp.br

**Supplemental table 1.** Primer sequences used in real time RT-PCR.

| Gene Symbol     | Gene name                                                             | Accession number | Primer Sequences (5'-3')   | Product (bp) | AT (°C) |
|-----------------|-----------------------------------------------------------------------|------------------|----------------------------|--------------|---------|
| <i>GUSB</i>     | glucuronidase, beta                                                   | NM_001083436.1   | F: AGAGCGAGTACGGAGCAGATG   | 85           | 60      |
|                 |                                                                       |                  | R: AGCAGGCCTTTCTGGTACTCTTC |              |         |
| <i>PPIA</i>     | Peptidylprolyl isomerase A (cyclophilin A) (PPIA)                     | NM_178320.2      | F: GGTCCTGGCATCTTGTCCAT    | 94           | 60      |
|                 |                                                                       |                  | R: TGCCATCCAACCACTCAGTCT   |              |         |
| <i>RPL15</i>    | Ribosomal protein L15                                                 | NM_001077866.1   | F: CAAACGCCAGTTCCTAAGG     | 94           | 60      |
|                 |                                                                       |                  | R: TCGAGCAAACCTTGAGCTGGTT  |              |         |
| <i>HDAC1</i>    | Histone deacetylase 1                                                 | NM_001037444.2   | F: TTACGACGGGGATGTTGGAA    | 136          | 60      |
|                 |                                                                       |                  | R: GGCTTTGTGAGGGCGATAGA    |              |         |
| <i>SIRT1</i>    | Sirtuin 1                                                             | NM_001192980.1   | F: TTGCAACAGCATCTTGCCTG    | 90           | 60      |
|                 |                                                                       |                  | R: GACATCGAGGAACCACTGAT    |              |         |
| <i>SIRT3</i>    | Sirtuin 3                                                             | NM_001206669.1   | F: TGGCGTTGTTTCCTCGTTCA    | 90           | 60      |
|                 |                                                                       |                  | R: CTGGAATACGAGGCCAGCG     |              |         |
| <i>PPARA</i>    | Peroxisome proliferator activated receptor alpha                      | NM_001034036     | F: CGGAAGGCTACTCCACGTTT    | 193          | 60      |
|                 |                                                                       |                  | R: TCACTGGTAAATTCCTAACACGA |              |         |
| <i>PPARGC1A</i> | Peroxisome proliferator-activated receptor gamma, coactivator 1 alpha | NM_177945.3      | F: TGTGCTCTGTGCTCACTGTGG   | 120          | 60      |
|                 |                                                                       |                  | R: GAGCAGCACACTCGATGTCA    |              |         |
| <i>SREBF1</i>   | Sterol Regulatory Element Binding Transcription Factor 1              | NM_001113302.1   | F: TGCTGACCGACATAGAAGACAT  | 81           | 60      |
|                 |                                                                       |                  | R: CGTAGGGCGGGTCAATAG      |              |         |
| <i>SLC2A1</i>   | Solute carrier family 2 (facilitated glucose                          | NM_174602.2      | F: CAAGAGAGTCGCAGACGGAG    | 135          | 60      |
|                 |                                                                       |                  | R: CCTGTCAGCTTCTTGCTGGT    |              |         |

|        |                                                                                    |                |                            |     |    |
|--------|------------------------------------------------------------------------------------|----------------|----------------------------|-----|----|
|        | transporter),<br>member 1                                                          |                |                            |     |    |
| SCD    | Stearoyl-CoA<br>desaturase<br>(delta-9-<br>desaturase)                             | NM_173959.4    | F: GTGGAGTCACCGAACCTACA    | 86  | 60 |
|        |                                                                                    |                | R: AAACGTCATTCTGGAACGCCA   |     |    |
| CPT1A  | Carnitine<br>palmitoyltransf<br>erase 1A                                           | NM_001304989.1 | F: TACCGACTCACATCCAGGCG    | 129 | 60 |
|        |                                                                                    |                | R: CGGAGCAGAGCGGAATCGTA    |     |    |
| FOXO3A | Forkhead box<br>O3                                                                 | NM_001206083.1 | F: GCAGGGAGCGCGATATTG      | 76  | 60 |
|        |                                                                                    |                | R: CGGGCACCATGAATCTGAA     |     |    |
| SOD1   | Superoxide<br>dismutase 1,<br>soluble                                              | NM_174615.2    | F: AAGATGAAGAGAGGCATGTTGGA | 65  | 60 |
|        |                                                                                    |                | R: GATGGCAACACCGTTTTTGTCT  |     |    |
| SOD2   | Superoxide<br>dismutase 2,<br>mitochondrial                                        | NM_201527.2    | F: TCTGTTGGTGTCCAAGGCTC    | 125 | 60 |
|        |                                                                                    |                | R: AGCAGGGGGATAAGACCTGT    |     |    |
| GPX1   | <i>Glutathione<br/>peroxidase 1</i>                                                | NM_174076.3    | F: CGGGTTCGAGCCCAACT       | 59  | 60 |
|        |                                                                                    |                | R: GCGCCTTCTCGCCATTC       |     |    |
| CAT    | <i>Catalase</i>                                                                    | NM_1035386.2   | F: CTATGGCCTCCGCGATCTTT    | 140 | 60 |
|        |                                                                                    |                | R: CGTGAGGCCAAACCTTGGA     |     |    |
| SLC2A3 | Solute carrier<br>family 2<br>(facilitated<br>glucose<br>transporter),<br>member 3 | NM_174603.3    | F: CTGGAAGAGGGGTCTCTGGA    | 101 | 60 |
|        |                                                                                    |                | R: CAGAGGTGCGGTGACCTTC     |     |    |

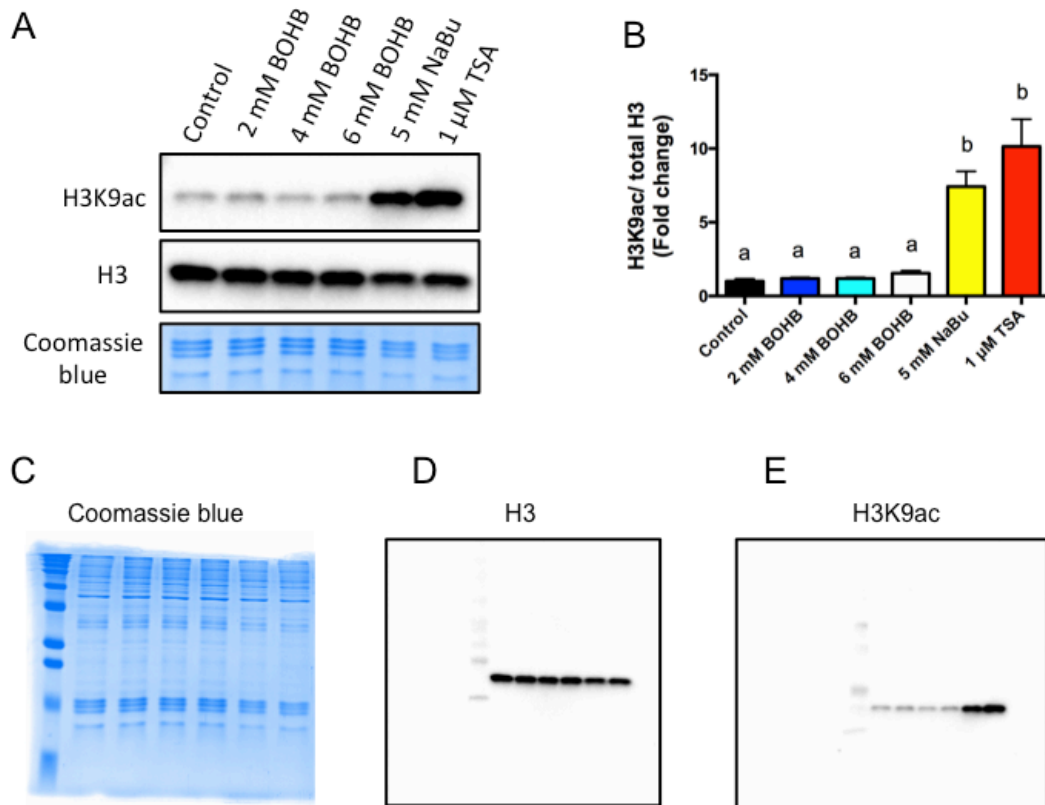

**Supplemental Figure 1.** (A) Immunoblots and (B) quantification values of H3K9ac in skin fibroblasts treated for 24 h with 0 mM (control), 2 mM, 4 mM or 6 mM BOHB. Additionally, we treated the cells with 5 mM sodium butyrate (NaBu) or 1  $\mu$ M TSA as positive controls. Data are representative of 3 independent WBs, and H3K9ac levels were calculated in relation to total histone 3 (H3). Data are presented as fold change in relation to the control group and are shown as the mean  $\pm$  s.e.m. Different letters indicate a significant difference ( $P < 0.05$ ). The western blot images were cropped for illustrative purposes. The full gels/blots are presented below. Supplemental Figure 1 (C) Coomassie blue gel. Supplemental Figure 1 (D) Total histone 3. Supplemental Figure 1 (E) H3K9ac.

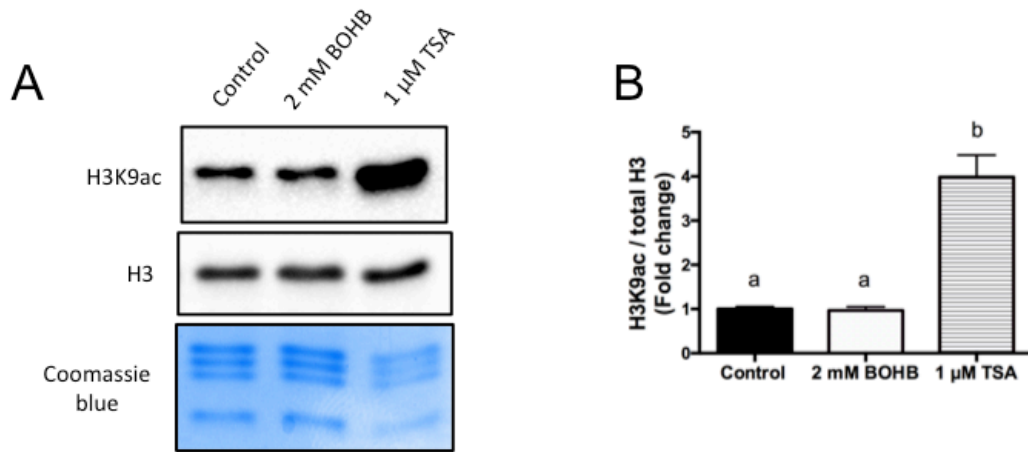

**Supplemental Figure 2.** (A) Immunoblots for H3K9ac on skin fibroblasts treated with control (0 mM BOHB) or 2 mM BOHB for 96 h and cells treated with 1 μM TSA for 8 h. (B) Quantification of H3K9ac levels on fibroblasts treated for 96 h. Data are representative of three pairs of biological replicates. The H3K9ac levels were calculated in relation to total Histone 3 (H3). Data are presented as fold change in relation to the control group, and the values are shown as the mean ± s.e.m. Different letters indicate statistical difference ( $P < 0.05$ ).

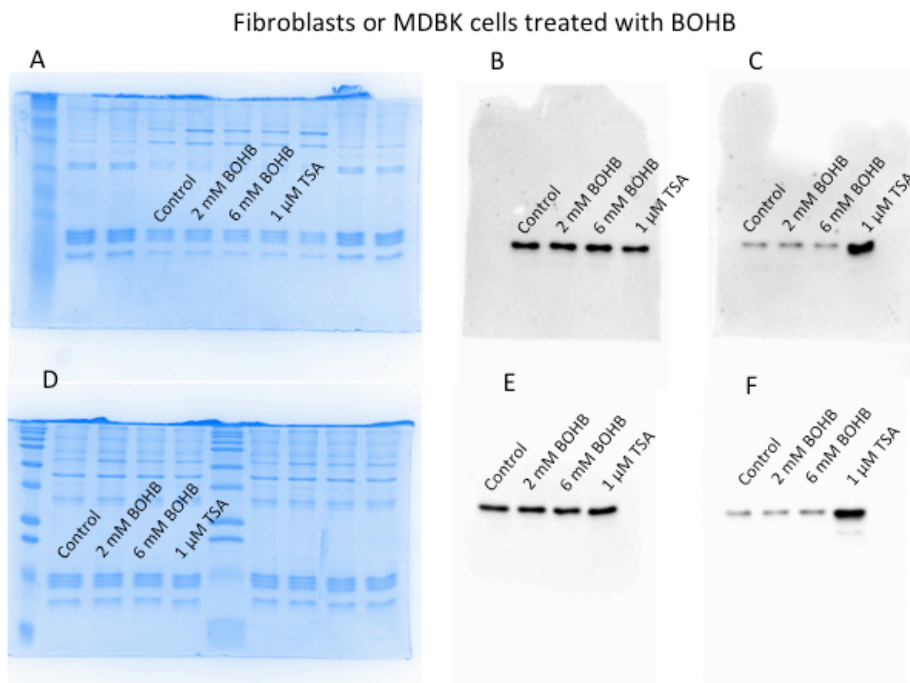

**Supplemental Figure 3.** Full immunoblots from data presented on Figure 1. (A) Coomassie staining in fibroblasts cells. (B) Immunoblot for total Histone H3 in fibroblasts. (C) Immunoblot for H3K9ac in fibroblasts. (D) Coomassie staining in

MDBK cells. (E) Immunoblot for total Histone H3 in MDBK cells. (F) Immunoblot for H3K9ac in MDBK cells.

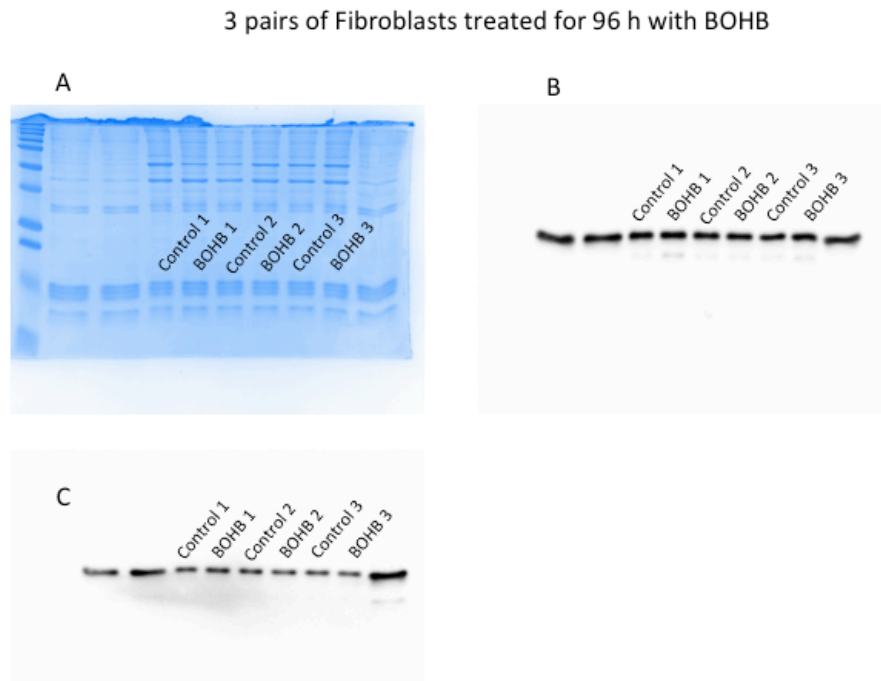

**Supplemental Figure 4.** Full immunoblots from data presented on Figure 2. (A) Coomassie staining in 3 pairs of fibroblasts. (B) Immunoblot for total Histone H3 in 3 pairs of fibroblasts. (C) Immunoblot for H3K9ac in 3 pairs of fibroblasts.

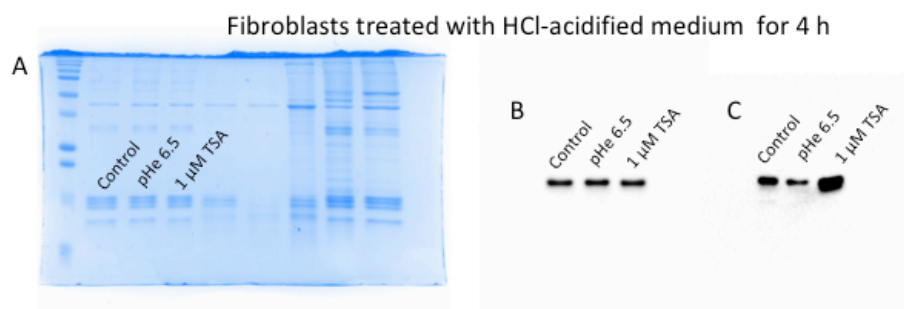

**Supplemental Figure 5.** Full immunoblots from data presented on Figure 3. (A) Coomassie staining in fibroblasts from control, HCl or Trichostatin A treated groups. (B) Immunoblot for total Histone H3. (C) Immunoblot for H3K9ac.

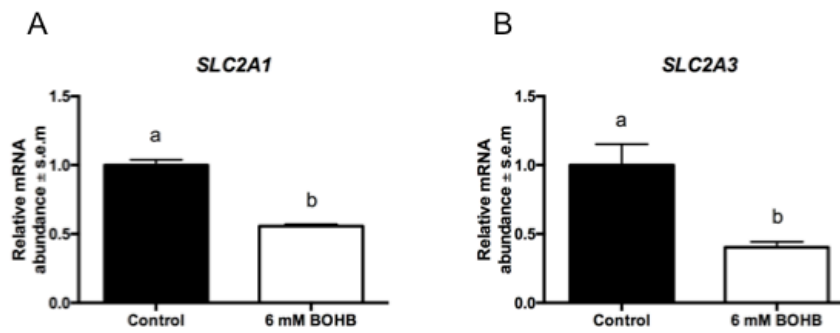

**Supplemental Figure 6.** Quantification of *SLC2A1* (A) and *SLC2A3* (B) transcripts in bovine skin fibroblasts cultured either with (6 mM) or without (control) BOHB for 12 h. Transcript amounts were normalized utilizing the geometric mean of housekeeping genes (*GUSB*, *PPIA* and *RPL15*). Data are presented as fold change in relation to the control group, and the values are shown as the mean  $\pm$  s.e.m. Different letters indicate statistical difference ( $P < 0.05$ ).

Cumulus cells treated with 2 mM BOHB

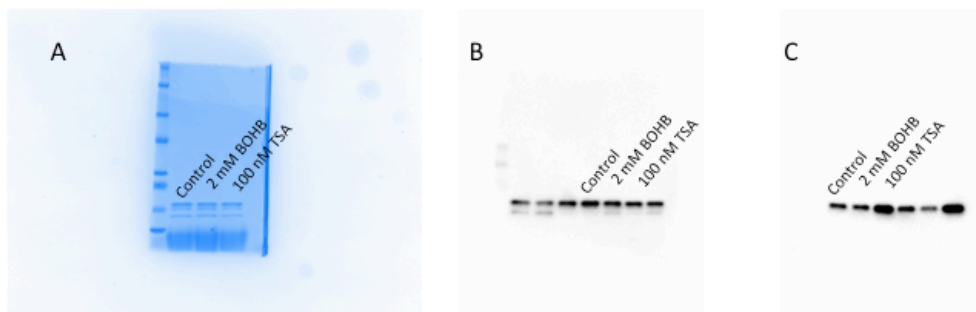

**Supplemental Figure 7.** Full immunoblots from data presented on Figure 5. (A) Coomassie staining in cumulus cells from control or BOHB treated group (B) Immunoblot for total Histone H3 in cumulus cells from control or BOHB treated group. (C) Immunoblot for H3K9ac in cumulus cells from control or BOHB treated group.

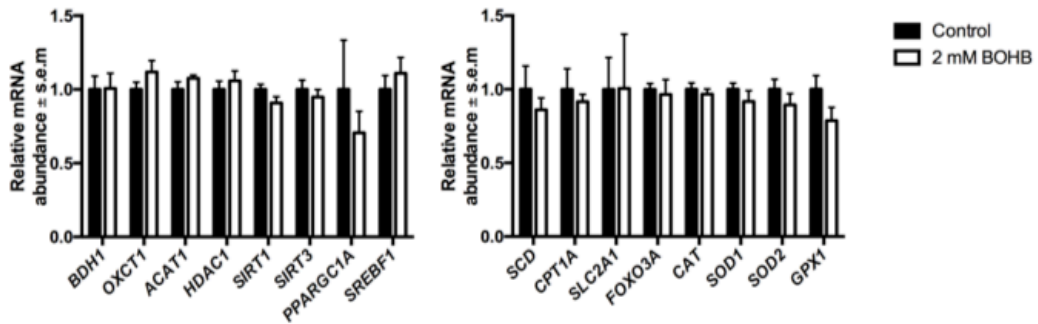

**Supplemental Figure 8.** Quantification of transcripts in bovine cumulus cells cultured either with (2 mM) or without (control) BOHB for 21-23h h. Transcript quantities were normalized utilizing the geometric mean of housekeeping genes (*GUSB*, *PPIA* and *RPL15*). Data are presented as fold change in relation to the control group, and the values are shown as the mean  $\pm$  s.e.m.

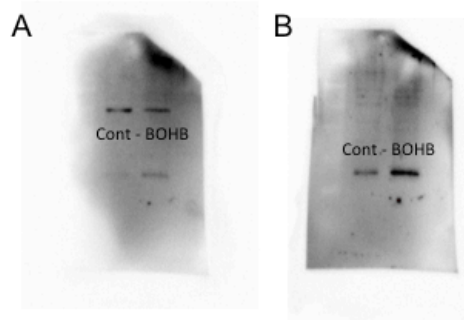

**Supplemental Figure 9.** Full immunoblots from data presented on Figure 9. (A) Immunoblots depicting  $\beta$ -actin levels on day 7 SCNT blastocysts treated or not with BOHB during the zygote stage. (B) Immunoblots depicting H3K9ac levels on day 7 SCNT blastocysts treated or not with BOHB during the zygote stage.
